# Supplementary material for: “Thank You for Your Sacrifice, I Will Try to Make Sure Your Donation Wasn’t in Vain”: Undergraduate Science Students’ Perceptions on the Use of Cadaveric Material in Learning Anatomy
Source: MDPI journal article supplement (doi:10.3390/educsci12070451), 2022-06-29
Supplement: s1 [file s1]

## Supplementary Material File S1

### **Block 1**

Please read the following Consent Form before progressing to the next question.

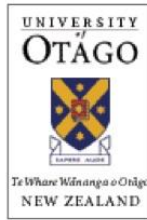

***Attitudes and expectations of science students in the use of human cadaveric tissues***

**CONSENT FORM FOR**

***PARTICIPANTS***

I have read the Information Sheet concerning this project and understand what it is about. All my questions have been answered to my satisfaction. I understand that I am free to request further information at any stage.

I know that:-

1. My participation in the project is entirely voluntary;
2. I am free to withdraw from the project at any time without any disadvantage;
3. Personal identifying information [names, email addresses, audio recordings] will be destroyed at the conclusion of the project but any raw data on which the results of the project depend will be retained in secure storage for at least five years;
4. If I participate in an interview and/or focus group, then I am aware that this part of the project involves an open-questioning technique. The general line of questioning includes individual opinions on why and how one learns anatomy, individual experiences of the laboratory environment, and dealing with death and dying. The precise nature of the questions which will be asked have not been determined in advance, but will depend on the way in which the interview develops and that in the event that the line of questioning develops in such a way that I feel hesitant or uncomfortable I may decline to answer any particular question(s) and/or may withdraw from the project without any disadvantage of any kind.
5. I understand that if I am interviewed and/or part of the focus groups for the study, I will go into a draw to win a \$100 New World Gift card.
6. The results of the project may be published and will be available in the University of Otago Library (Dunedin, New Zealand) but every attempt will be made to preserve my anonymity.

Please read the following Consent Form before progressing to the next question.



***Attitudes and expectations of science students in the use of human cadaveric tissues***

**CONSENT FORM FOR  
PARTICIPANTS**

I have read the Information Sheet concerning this project and understand what it is about. All my questions have been answered to my satisfaction. I understand that I am free to request further information at any stage.

I know that:-

1. My participation in the project is entirely voluntary;
2. I am free to withdraw from the project at any time without any disadvantage;
3. Personal identifying information [names, email addresses, audio recordings] will be destroyed at the conclusion of the project but any raw data on which the results of the project depend will be retained in secure storage for at least five years;
4. If I participate in an interview and/or focus group, then I am aware that this part of the project involves an open-questioning technique. The general line of questioning includes individual opinions on why and how one learns anatomy, individual experiences of the laboratory environment, and dealing with death and dying. The precise nature of the questions which will be asked have not been determined in advance, but will depend on the way in which the interview develops and that in the event that the line of questioning develops in such a way that I feel hesitant or uncomfortable I may decline to answer any particular question(s) and/or may withdraw from the project without any disadvantage of any kind.
5. I understand that if I am interviewed and/or part of the focus groups for the study, I will go into a draw to win a \$100 New World Gift card.
6. The results of the project may be published and will be available in the University of Otago Library (Dunedin, New Zealand) but every attempt will be made to preserve my anonymity.

Please read the following Consent Form before progressing to the next question.



***Attitudes and expectations of science students in the use of human cadaveric tissues***

**CONSENT FORM FOR**

***PARTICIPANTS***

I have read the Information Sheet concerning this project and understand what it is about. All my questions have been answered to my satisfaction. I understand that I am free to request further information at any stage.

I know that:-

1. My participation in the project is entirely voluntary;
2. I am free to withdraw from the project at any time without any disadvantage;
3. Personal identifying information [names, email addresses, audio recordings] will be destroyed at the conclusion of the project but any raw data on which the results of the project depend will be retained in secure storage for at least five years;
4. If I participate in an interview and/or focus group, then I am aware that this part of the project involves an open-questioning technique. The general line of questioning includes individual opinions on why and how one learns anatomy, individual experiences of the laboratory environment, and dealing with death and dying. The precise nature of the questions which will be asked have not been determined in advance, but will depend on the way in which the interview develops and that in the event that the line of questioning develops in such a way that I feel hesitant or uncomfortable I may decline to answer any particular question(s) and/or may withdraw from the project without any disadvantage of any kind.
5. I understand that if I am interviewed and/or part of the focus groups for the study, I will go into a draw to win a \$100 New World Gift card.
6. The results of the project may be published and will be available in the University of Otago Library (Dunedin, New Zealand) but every attempt will be made to preserve my anonymity.

Do you agree to take part in this project?

Yes, I give my consent to be part of this project titled "attitudes and expectations of science students in the use of human cadaveric material"

Please enter your University Student ID number:

What is your age?

What is your gender?

Male

Female

Other (please specify)

Which ethnic group do you belong to?

NZ European

Māori

Samoaan

Cook Island Māori

Tongan

Niuean

Chinese

Indian

Other (Please Specify)

## Block 2

What is the name of the Major (degree) you are studying towards? e.g. Anatomy/ Physiology etc.

Anatomy

Other (please specify)

Please describe any previous tertiary study you have undertaken in anatomy (if you have not studied anatomy before please type NIL):



Do you have further tertiary study plans after your current degree?

Medicine

Physiotherapy

Dentistry

Pharmacy

Postgraduate study (please specify)

Other (please specify)

I have no further plans

Why did you choose this paper (ANAT241) to study?  
(Please write as much as you wish)

## Block 3

The following questions will be asking for your experiences with, and perceptions, opinions and attitudes towards death and handling cadaveric material whilst studying anatomy.

Outside of your study, have you seen a dead body before?

Yes

No

Please indicate if it was/they were a:

Relative

Friend

Stranger

Do you have a religious and/or spiritual component to your life?

Yes

No

What are your feelings about death? (please write as much as you wish)

Would you donate your body to medical sciences?

Yes

No

Unsure

Would you be opposed to a close family member donating their body to medical sciences?

Yes

No

Unsure

## **Block 4**

What are your feelings about the cadaver? (please write as much as you wish)

If you could, is there anything you would say to the donor? (please write as much as you wish)

If you could, is there anything you would say to the donors families? (please write as much as you wish)

## Block 5

During your HUBS course in first year, how much did you interact with the prosecutions?

A great deal

A lot

A moderate amount

A little

None at all

Do you think that handling cadaveric material in ANAT241 will affect you?

Yes

No

Unsure

How do you think handling cadaveric material in ANAT241 will affect you? (please write as much as you wish)

Do you feel prepared for handling prosections?

Yes

Somewhat prepared

No

Why? (please write as much as you wish)

What do you think will be the hardest part of handling the prosecutions? (please write as much as you wish)

What do you think you will learn from handling human cadaveric tissue? (please write as much as you wish)

Which of the following closely describes your anticipation towards the lab?

Very excited

Excited

Neutral

Somewhat anxious/nervous

Very anxious/nervous

Rank your level of stress towards thinking about going into the laboratory:

No stress 0

1

2

3  
4  
Very stressed 5

In Māori culture, the dead body is recognized as tapu (sacred or restricted) and it is necessary for Māori students to take part in a ritual to allow them to enter and work in the dissecting room safely. The Department of Anatomy holds a clearing of the way ceremony (whakawātea) at the beginning of each academic year to meet this need and all students studying anatomy are invited to attend.

The following questions relate to the whakawātea (clearing of the way ceremony).

Did you know about the whakawātea (clearing of the way ceremony)?

Yes

No

How did you find out about the whakawātea (clearing of the way ceremony)? (please write as much as you wish)

Did you attend the whakawātea (clearing of the way ceremony)?

Yes

No

Why? (please write as much as you wish)

Did it help you feel more comfortable about being in the laboratory and handling cadaveric tissue? (please write as much as you wish)

Would you consider attending the whakawātea (clearing of the way ceremony) in the future?

Yes

No



Why? (please write as much as you wish)

Do you have any other comments you would like to make relating to the topics we have covered in this questionnaire? (Please write as much as you wish).

## **Block 1**

Would you be willing to be contacted at a later date to participate in a small focus group and/or individual interview regarding this topic (attitudes and perceptions towards using cadaveric material in their studying anatomy)?

If not, then please skip this question and submit your survey answers.

Yes, focus group (please include a contact email address)

Yes, individual interview (please include a contact email address)

Powered by Qualtrics

## Supplementary Material File S2

### **Block 1**

Please read the following Consent Form before progressing to the next question.



***Attitudes and expectations of science students in the use of human cadaveric tissues***

**CONSENT FORM FOR**

***PARTICIPANTS***

I have read the Information Sheet concerning this project and understand what it is about. All my questions have been answered to my satisfaction. I understand that I am free to request further information at any stage.

I know that:-

1. My participation in the project is entirely voluntary;
2. I am free to withdraw from the project at any time without any disadvantage;
3. Personal identifying information [names, email addresses, audio recordings] will be destroyed at the conclusion of the project but any raw data on which the results of the project depend will be retained in secure storage for at least five years;
4. If I participate in an interview and/or focus group, then I am aware that this part of the project involves an open-questioning technique. The general line of questioning includes individual opinions on why and how one learns anatomy, individual experiences of the laboratory environment, and dealing with death and dying. The precise nature of the questions which will be asked have not been determined in advance, but will depend on the way in which the interview develops and that in the event that the line of questioning develops in such a way that I feel hesitant or uncomfortable I may decline to answer any particular question(s) and/or may withdraw from the project without any disadvantage of any kind.
5. I understand that if I am interviewed and/or part of the focus groups for the study, I will go into a draw to win a \$100 New World Gift card.
6. The results of the project may be published and will be available in the University of Otago Library (Dunedin, New Zealand) but every attempt will be made to preserve my anonymity.

Do you agree to take part in this project?

Yes, I give my consent to be part of this project titled "attitudes and expectations of science students in the use of human cadaveric material"

Please enter your University Student ID number:

What is your age?

What is your gender?

Male

Female

Other (please specify)

Which ethnic group do you belong to?

NZ European

Māori

Samoaan

Cook Island Māori

Tongan

Niuean

Chinese

Indian

Other (Please Specify)

## Block 2

What is the name of the Major (degree) you are studying towards?  
e.g. Anatomy/ Physiology etc.

Anatomy

Other (please specify)

Please describe any previous tertiary study you have undertaken in anatomy (if you have not studied anatomy before please type NIL):

Do you have further tertiary study plans after your current degree?

Medicine

Physiotherapy

Dentistry

Pharmacy

Postgraduate study (please specify)

Other (please specify)

I have no further plans

Why did you choose this paper (ANAT331) to study?  
(Please write as much as you wish)

## Block 3

The following questions will be asking for your experiences with, and perceptions, opinions and attitudes towards death and handling cadaveric material whilst studying anatomy.

Outside of your study, have you seen a dead body before?

Yes

No

Please indicate if it was/they were a:

Relative

Friend

Stranger

Do you have a religious and/or spiritual component to your life?

Yes

No



What are your feelings about death? (please write as much as you wish)

Would you donate your body to medical sciences?

Yes

No

Unsure

Would you be opposed to a close family member donating their body to medical sciences?

Yes

No

Unsure

## **Block 4**

What are your feelings about the cadaver? (please write as much as you wish)

If you could, is there anything you would say to the donor? (please write as much as you wish)

If you could, is there anything you would say to the donors families? (please write as much as you wish)

## Block 5

During your first and second years of study, how much did you interact with the prosecutions?

A great deal

A lot

A moderate amount

A little

None at all

Do you think that dissection in ANAT331 will affect you?

Yes

No

Unsure

How do you think dissection in ANAT331 will affect you?  
(please write as much as you wish)

Do you feel prepared for dissection?

Yes

Somewhat prepared

No

Why? (please write as much as you wish)

What do you think will be the hardest part of dissection?  
(please write as much as you wish)

What do you think you will learn from dissection? (please write as much as you wish)

Which of the following closely describes your anticipation towards the Dissection Room (DR)?

Very excited

Excited

Neutral

Somewhat anxious/nervous

Very anxious/nervous

Rank your level of stress towards thinking about going into the Dissection Room (DR):

No stress 0

1

2

3

4

Very stressed 5

In Māori culture, the dead body is recognized as tapu (sacred or restricted) and it is necessary for Māori students to take part in a ritual to allow them to enter and work in the dissecting room safely. The Department of Anatomy holds a clearing of the way ceremony (whakawātea) at the beginning of each academic year to meet this need and all students studying anatomy are invited to attend.

The following questions relate to the whakawātea (clearing of the way ceremony).

Did you know about the whakawātea (clearing of the way ceremony)?

Yes

No

How did you find out about the whakawātea (clearing of the way ceremony)? (please write as much as you wish)

Did you attend the whakawātea (clearing of the way ceremony)?

Yes

No

Why? (please write as much as you wish)

Did it help you feel more comfortable about being in the laboratory and handling cadaveric tissue? (please write as much as you wish)

Would you consider attending the whakawātea (clearing of the way ceremony) in the future?

Yes

No

Why? (please write as much as you wish)

Do you have any other comments you would like to make relating to the topics we have covered in this questionnaire? (Please write as much as you wish).

## Block 1

Would you be willing to be contacted at a later date to participate in a small focus group and/or individual interview regarding this topic (attitudes and perceptions towards using cadaveric material in their studying anatomy)?

If not, then please skip this question and submit your survey answers.

Yes, focus group (please include a contact email address)

Yes, individual interview (please include a contact email address)

Powered by Qualtrics



## Supplementary Material File S3

### **Default Question Block**

Please read the following Consent Form before progressing to the next question.



***Attitudes and expectations of science students in the use of human cadaveric tissues***

**CONSENT FORM FOR**

***PARTICIPANTS***

I have read the Information Sheet concerning this project and understand what it is about. All my questions have been answered to my satisfaction. I understand that I am free to request further information at any stage.

I know that:-

1. My participation in the project is entirely voluntary;
2. I am free to withdraw from the project at any time without any disadvantage;
3. Personal identifying information [names, email addresses, audio recordings] will be destroyed at the conclusion of the project but any raw data on which the results of the project depend will be retained in secure storage for at least five years;
4. If I participate in an interview and/or focus group, then I am aware that this part of the project involves an open-questioning technique. The general line of questioning includes individual opinions on why and how one learns anatomy, individual experiences of the laboratory environment, and dealing with death and dying. The precise nature of the questions which will be asked have not been determined in advance, but will depend on the way in which the interview develops and that in the event that the line of questioning develops in such a way that I feel hesitant or uncomfortable I may decline to answer any particular question(s) and/or may withdraw from the project without any disadvantage of any kind.
5. I understand that if I am interviewed and/or part of the focus groups for the study, I will go into a draw to win a \$100 New World Gift card.
6. The results of the project may be published and will be available in the University of Otago Library (Dunedin, New Zealand) but every attempt will be made to preserve my anonymity.

Do you agree to take part in this project?

Yes, I give my consent to be part of this project titled "attitudes and expectations of science students in the use of human cadaveric material"

Please enter your University Student ID Number:

What is your age?

What is your gender?

Male

Female

Other (please specify)

Which ethnic group do you belong to?

NZ European

Māori

Samoaan

Cook Island Māori

Tongan

Niuean

Chinese

Indian

Other (Please Specify)

How has your experience been with prosecutions during this paper? (Please write as much as you wish)

How do you feel you coped with handling prosecutions? (Please write as much as you wish)

In comparison to when you first started this paper, how do you feel about using prosections now? (Please write as much as you wish)

What was the hardest part of handling prosections? (Please write as much as you wish)

What was the best part? (Please write as much as you wish)

Has your gross anatomy lab experience changed your attitude toward anatomy in general?

Yes

No

Unsure

Please explain (Please write as much as you wish).

When ENTERING the laboratory class for the FIRST TIME did you experience any physical symptoms (e.g. sweating, nausea, dizziness etc.)?

Yes

No

Unsure

Please describe (write as much as you wish)

When HANDLING the prosecutions for the FIRST TIME, did you experience any physical symptoms (e.g. sweating, nausea, dizziness etc. )?

Yes

No

Unsure

Please describe (write as much as you wish)

What is your physical reaction now? (please write as much as you wish)

Rank the level of stress you experienced in the laboratory class DURING THE FIRST SESSION

No stress at all 0

1

2  
3  
4  
Very stressed 5

Rank your level of stress experienced in the laboratory  
NOW

No stress at all 0  
1  
2  
3  
4  
Very stressed 5

What have you learnt from working with prosecutions?  
(Please write as much as you wish)

What learning resources proved most useful to your  
learning of anatomy?

Please rank (by dragging and dropping) the following  
options in order from most useful (1) to least useful (10)



Anatomy textbooks

Working with bones

Working with prosections

Tutorials (personal or otherwise)

Online e-Anatomy programmes

Lectures

Post Lecture Quizzes

Flashcards

Lab Intros/ wrap-ups

Virtual Slidebox

What did you learn about yourself from working in the laboratory class with prosections? (Please write as much as you wish)

Has working with prosecutions in the laboratory class had any effect on you and/or your personal beliefs?

Yes

No

Unsure

Please explain (Please write as much as you wish)

Has your attitude towards death changed over the past semester?

Yes

No

Unsure

Please explain (Please write as much as you wish)

Has your attitude to the cadaver changed?

Yes

No

Unsure

Please explain (Please write as much as you wish)

Following your interaction with the prosecutions in ANAT 241, would you donate your body to medical sciences?

Yes

No

Unsure

Has your opinion on this changed since the start of the course?

Yes

No

Unsure

Please explain (write as much as you wish).

Do you separate the cadaver/prosections from the person that they were?

Yes

No

Unsure

What would you like to say to the donors now? (Please write as much as you wish)

Were there any thoughts that came to mind during the laboratory classes that surprised you? (Please write as much as you wish)

Do you think that the use of prosecutions in this course was relevant to what you want to do in future?

Yes

No

Unsure

Please explain (Please write as much as you wish)

Would you like to continue to study gross anatomy using cadaveric tissue?

Yes

No

Unsure

Are you interested in taking part in a focus group and/or an individual interview in Semester 2 to discuss this topic further? (please select all relevant answers)

Yes, focus group (please provide a contact email address)

Yes, individual interview (please provide a contact email address)

No

Powered by Qualtrics

## Supplementary Material File S4

### **Default Question Block**

Please read the following Consent Form before progressing to the next question.



***Attitudes and expectations of science students in the use of human cadaveric tissues***

**CONSENT FORM FOR**

***PARTICIPANTS***

I have read the Information Sheet concerning this project and understand what it is about. All my questions have been answered to my satisfaction. I understand that I am free to request further information at any stage.

I know that:-

1. My participation in the project is entirely voluntary;
2. I am free to withdraw from the project at any time without any disadvantage;
3. Personal identifying information [names, email addresses, audio recordings] will be destroyed at the conclusion of the project but any raw data on which the results of the project depend will be retained in secure storage for at least five years;
4. If I participate in an interview and/or focus group, then I am aware that this part of the project involves an open-questioning technique. The general line of questioning includes individual opinions on why and how one learns anatomy, individual experiences of the laboratory environment, and dealing with death and dying. The precise nature of the questions which will be asked have not been determined in advance, but will depend on the way in which the interview develops and that in the event that the line of questioning develops in such a way that I feel hesitant or uncomfortable I may decline to answer any particular question(s) and/or may withdraw from the project without any disadvantage of any kind.
5. I understand that if I am interviewed and/or part of the focus groups for the study, I will go into a draw to win a \$100 New World Gift card.
6. The results of the project may be published and will be available in the University of Otago Library (Dunedin, New Zealand) but every attempt will be made to preserve my anonymity.



Do you agree to take part in this project? (please click on the box below)

Yes, I give my consent to be part of this project titled "attitudes and expectations of science students in the use of human cadaveric material"

Please enter your University Student ID Number:

What is your age?

What is your gender?

Male

Female

Other (please specify)

Which ethnic group do you belong to?

NZ European

Māori

Samoa

Cook Island Māori

Tongan

Niuean

Chinese

Indian

Other (Please Specify)

How has your experience been with dissection in ANAT 331? (please write as much as you wish)

How do you feel you coped with dissection? (please write as much as you wish)

In comparison to when you first started this paper, how do you feel about dissecting now? (please write as much as you wish)

What was the hardest part of dissecting? (please write as much as you wish)

What was the best part? (please write as much as you wish)

Has your dissection lab experience changed your attitude toward anatomy in general?

Yes

No

Unsure

Please explain (please write as much as you wish)

When GOING TO THE DISSECTION ROOM FOR THE FIRST TIME, did you experience any physical symptoms eg. sweating, nausea, dizziness etc?

Yes

No

Unsure

Please describe (please write as much as you wish)

When CARRYING OUT THE FIRST DISSECTION, did you experience any physical symptoms eg. sweating, nausea, dizziness etc?

Yes

No

Unsure

Please describe (please write as much as you wish)

What is your physical reaction to dissection now?  
(please write as much as you wish)

Rank the level of stress you experienced in the dissection room DURING THE FIRST SESSION

No stress 0

1

2  
3  
4  
Very stressed 5

Rank your level of stress experienced in the dissection room NOW

No stress 0  
1  
2  
3  
4  
Very stressed 5

What have you learnt from dissecting? (please write as much as you wish)

What learning resources proved most useful to your learning of anatomy?

Please rank (by dragging and dropping) the following options in order from most useful (1) to least useful (11)

Anatomy textbooks

Working with bones

Working with prosections

Dissection

Tutorials (personal or otherwise)

Online e-Anatomy programmes

Body painting

Lectures

Flashcards

Podcasts

eWiki

What did you learn about yourself from participating in dissection? (please write as much as you wish)

Has participating in dissection had any effect on you or your personal beliefs?

Yes

No

Unsure

Please explain (please write as much as you wish)

Has your attitude towards death changed over the past semester?

Yes

No

Unsure

Please explain (please write as much as you wish)



Has your attitude to the cadaver changed?

Yes

No

Unsure

Please explain (please write as much as you wish)

Following your dissection experiences in ANAT 331,  
would you donate your body to medical sciences?

Yes

No

Unsure

Has your opinion on this changed since the start of the  
course?

Yes

No

Unsure

Please explain (write as much as you wish)

Do you separate the cadaver/prosections from the person that they were?

Yes

No

Unsure

What would you like to say to the donor now? (Please write as much as you wish)

Were there any thoughts that came to mind during dissection that surprised you? (please write as much as you wish)

Do you think that the experience of dissection in this course was relevant to what you want to do in future?

Yes

No

Unsure

Please explain (please write as much as you wish)

Would you like to continue to study gross anatomy using cadaveric tissue?

Yes

No

Unsure

Would be be interested in taking part in a focus group and/or individual interview in Semester 2, to discuss this topic further? (please select all relevant answers)

Yes, focus groups (please provide contact email address)

Yes, individual interview (please provide contact email address)

No

Powered by Qualtrics
