# Supplementary material for: “Thank You for Your Sacrifice, I Will Try to Make Sure Your Donation Wasn’t in Vain”: Undergraduate Science Students’ Perceptions on the Use of Cadaveric Material in Learning Anatomy
Source: MDPI journal article supplement (doi:10.3390/educsci12070451), 2022-06-29
Supplement: s1 [file s1]

Archive with 1 entries (1 files):
- education-1729246-supplementary.pdf
